# Supplementary material
Source: Copernicus journal article supplement (doi:10.5194/essd-18-4451-2026)
Supplement: Supplementary file 1 [file essd-18-4451-2026-supplement.pdf]

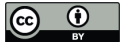

*Supplement of*

## **High-resolution, multi-depth mapping of soil bulk density and pH in China's forests using machine learning**

**Jizhen Chen et al.**

*Correspondence to:* Zhilin Huang (hzlin66@caf.ac.cn)

The copyright of individual parts of the supplement might differ from the article licence.

# S1 Supplementary Figures

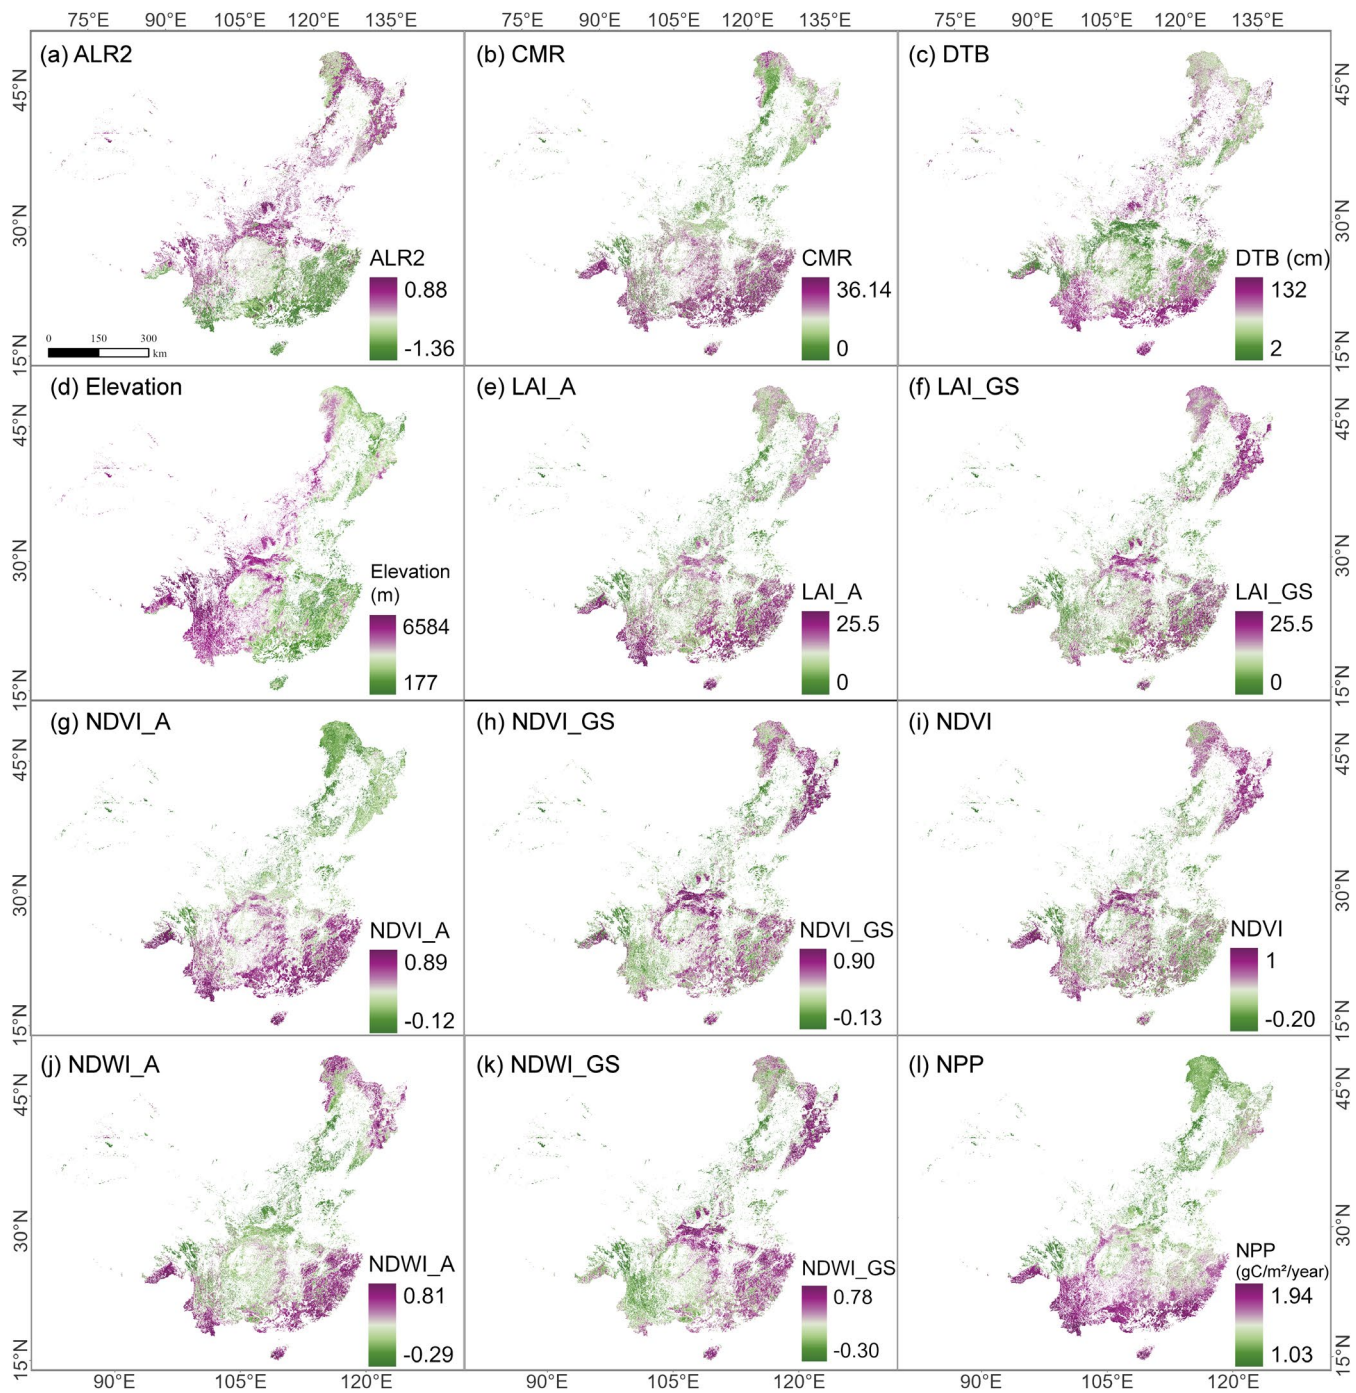

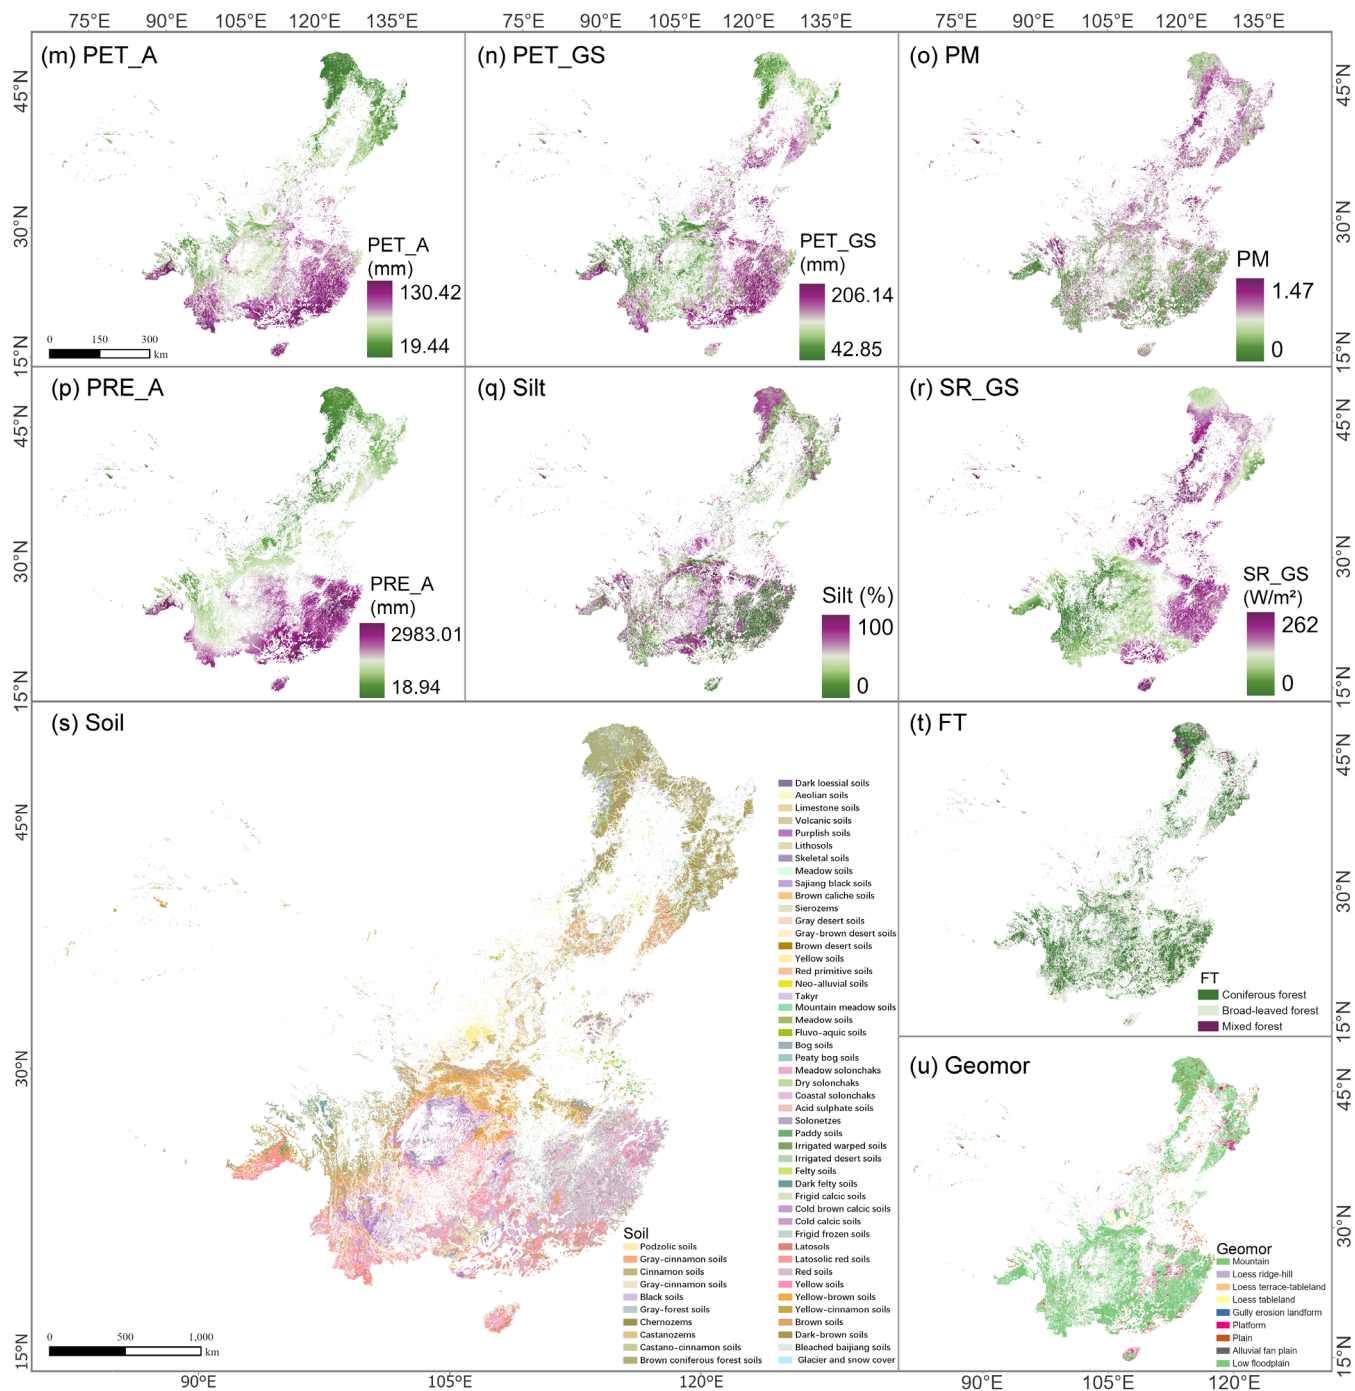

Figure S1. Spatial Distribution of Covariates Selected by Feature Ranking and Selection (FRFS) method.

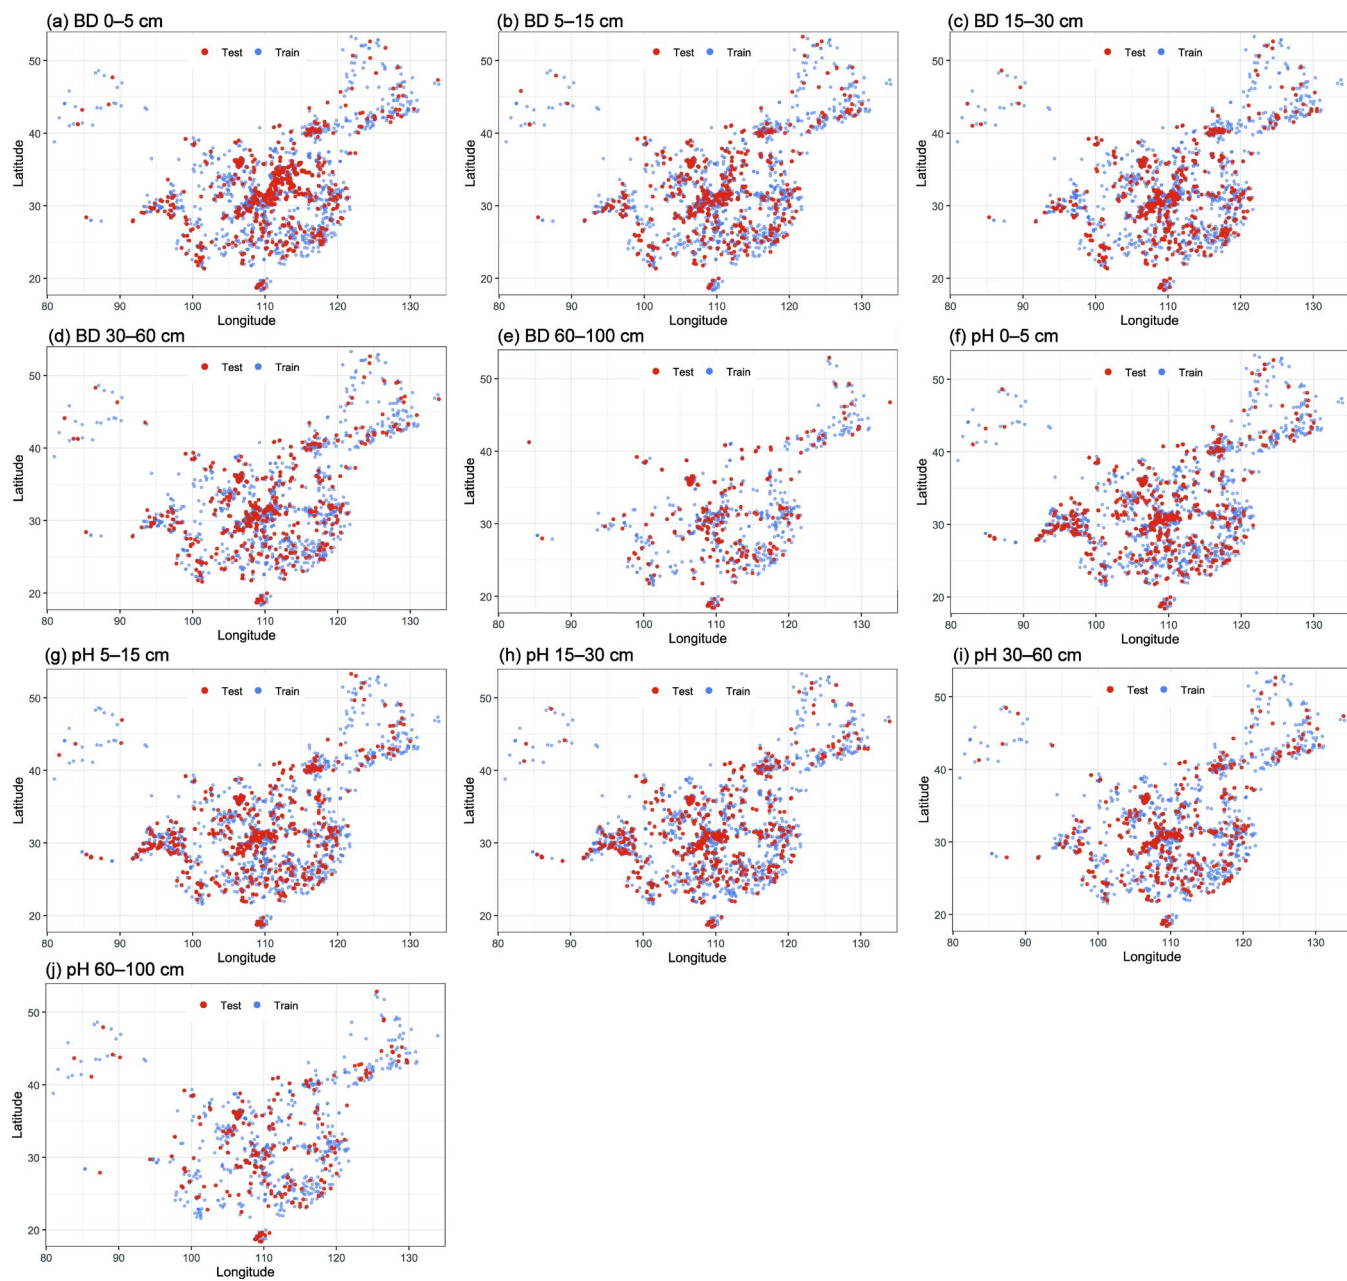

Figure S2. Spatial distributions of the training and validation datasets for bulk density (BD) and pH across different soil layers.

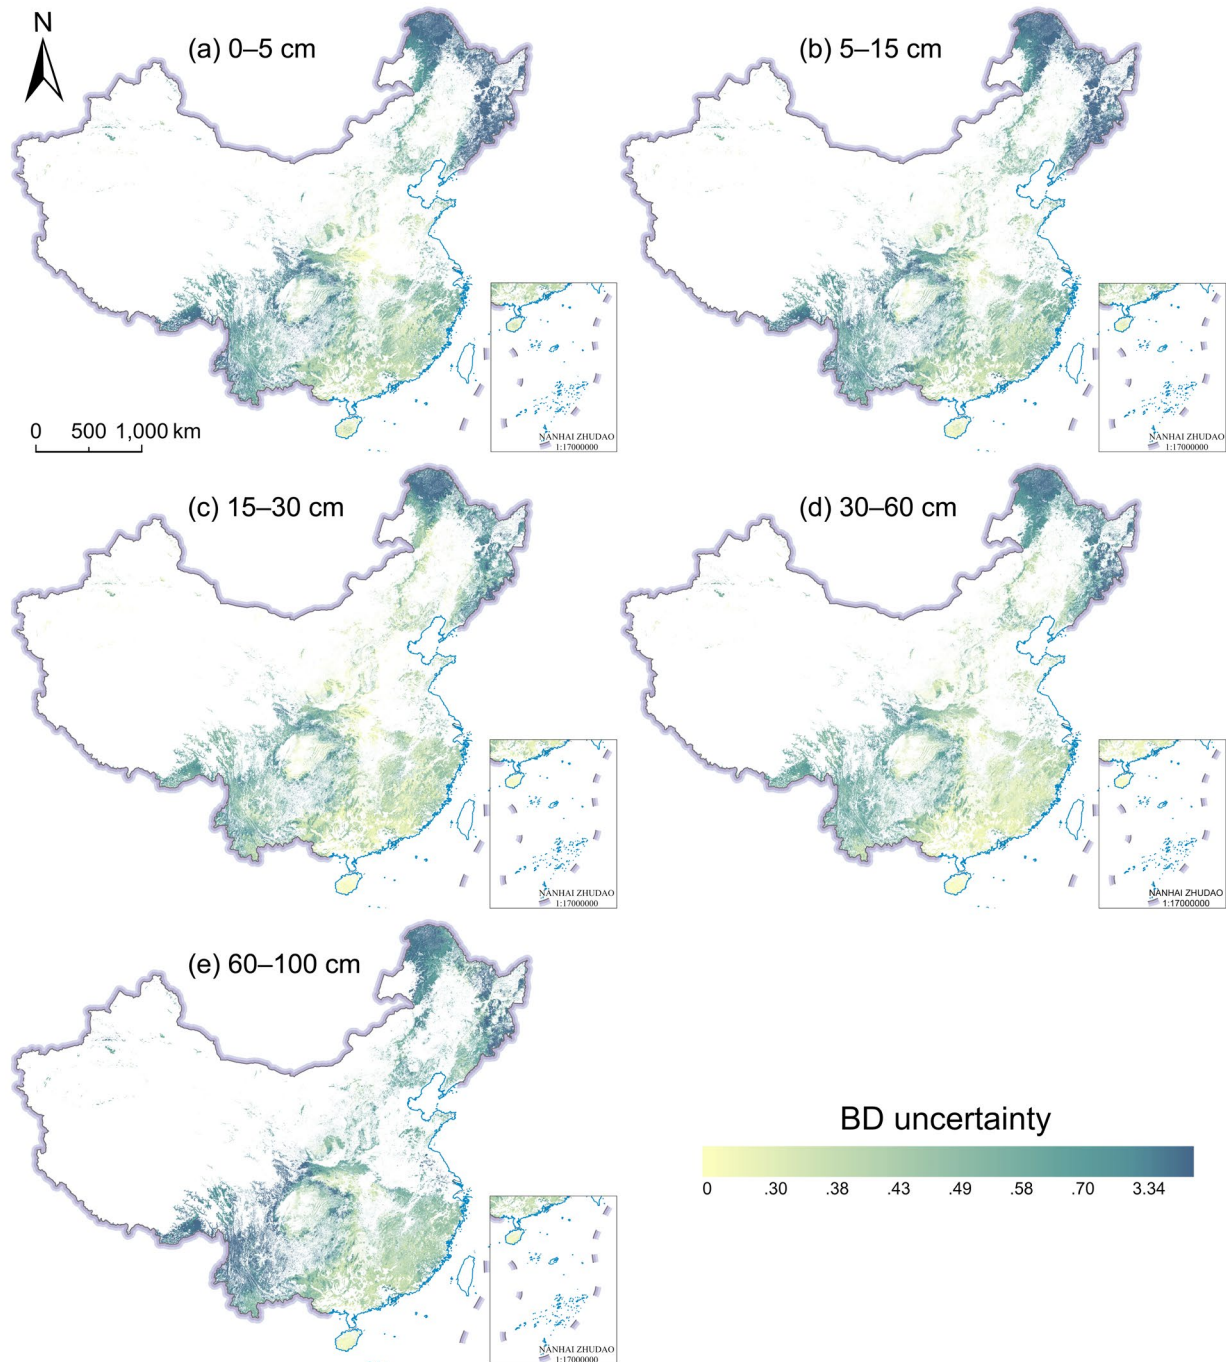

Figure S3. Uncertainty maps of predicted bulk density (BD) at 0–5 cm (a), 5–15 cm (b), 15–30 cm (c), 30–60 cm (d) and 60–100 cm (e) depths. Publisher's remark: please note that the above figure contains disputed territories.

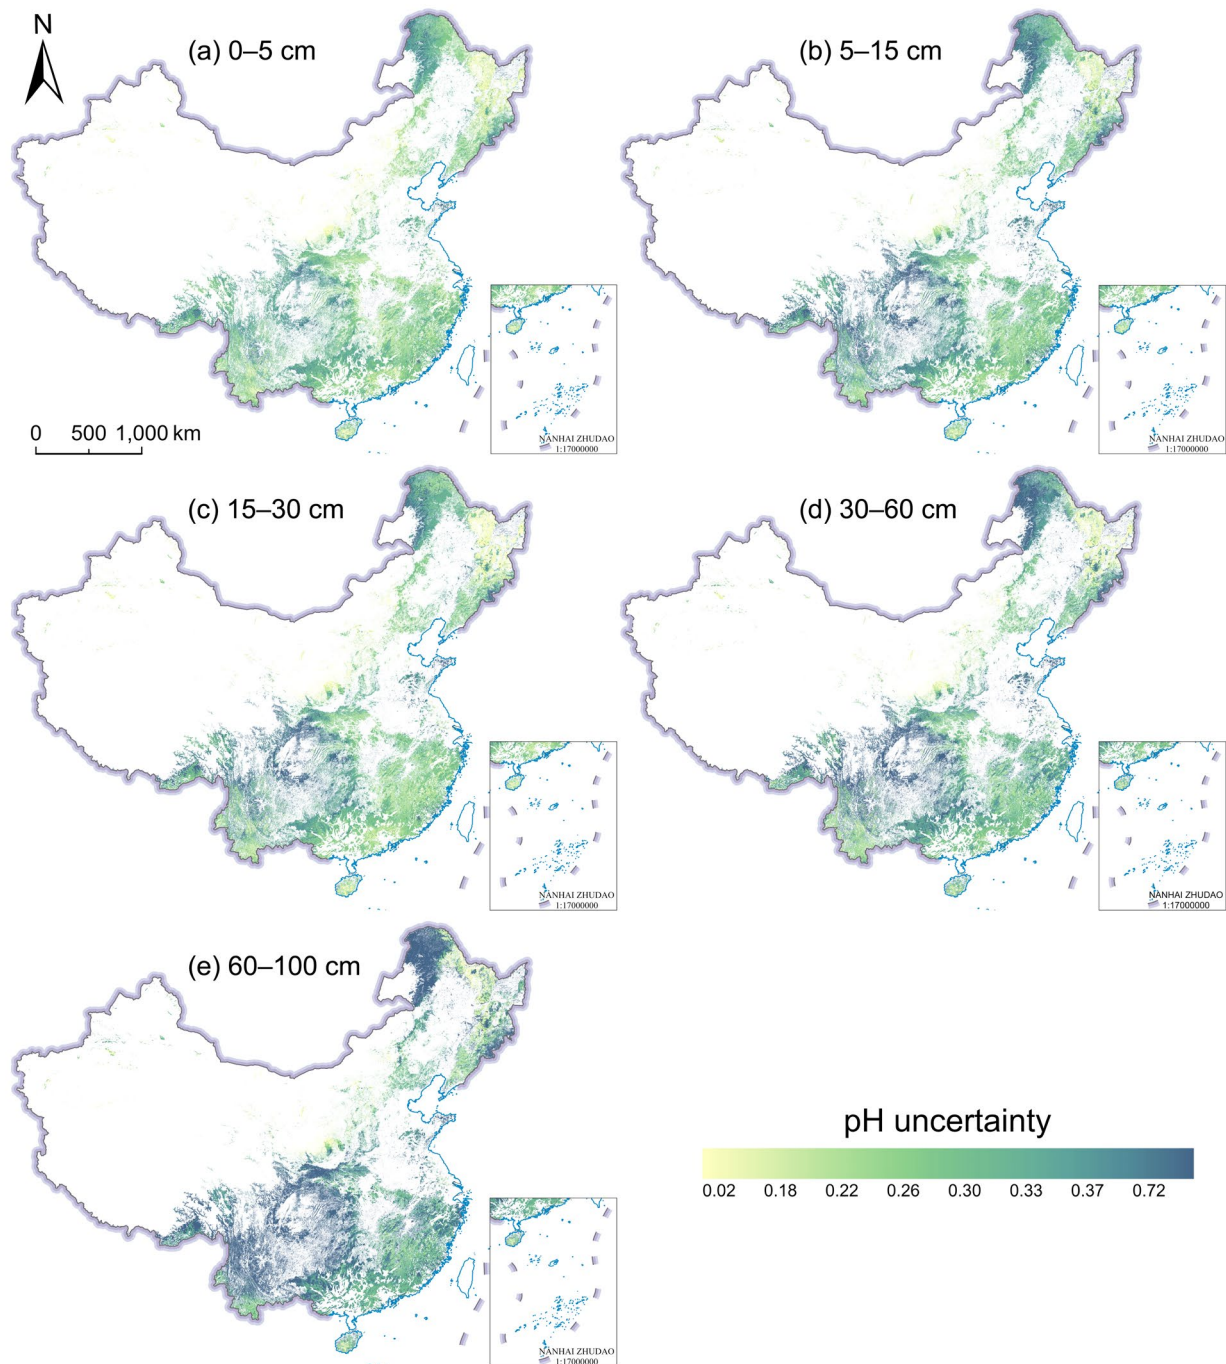

**Figure S4. Uncertainty maps of predicted pH at 0–5 cm (a), 5–15 cm (b), 15–30 cm (c), 30–60 cm (d) and 60–100cm (e) depths.**  
 Publisher's remark: please note that the above figure contains disputed territories.

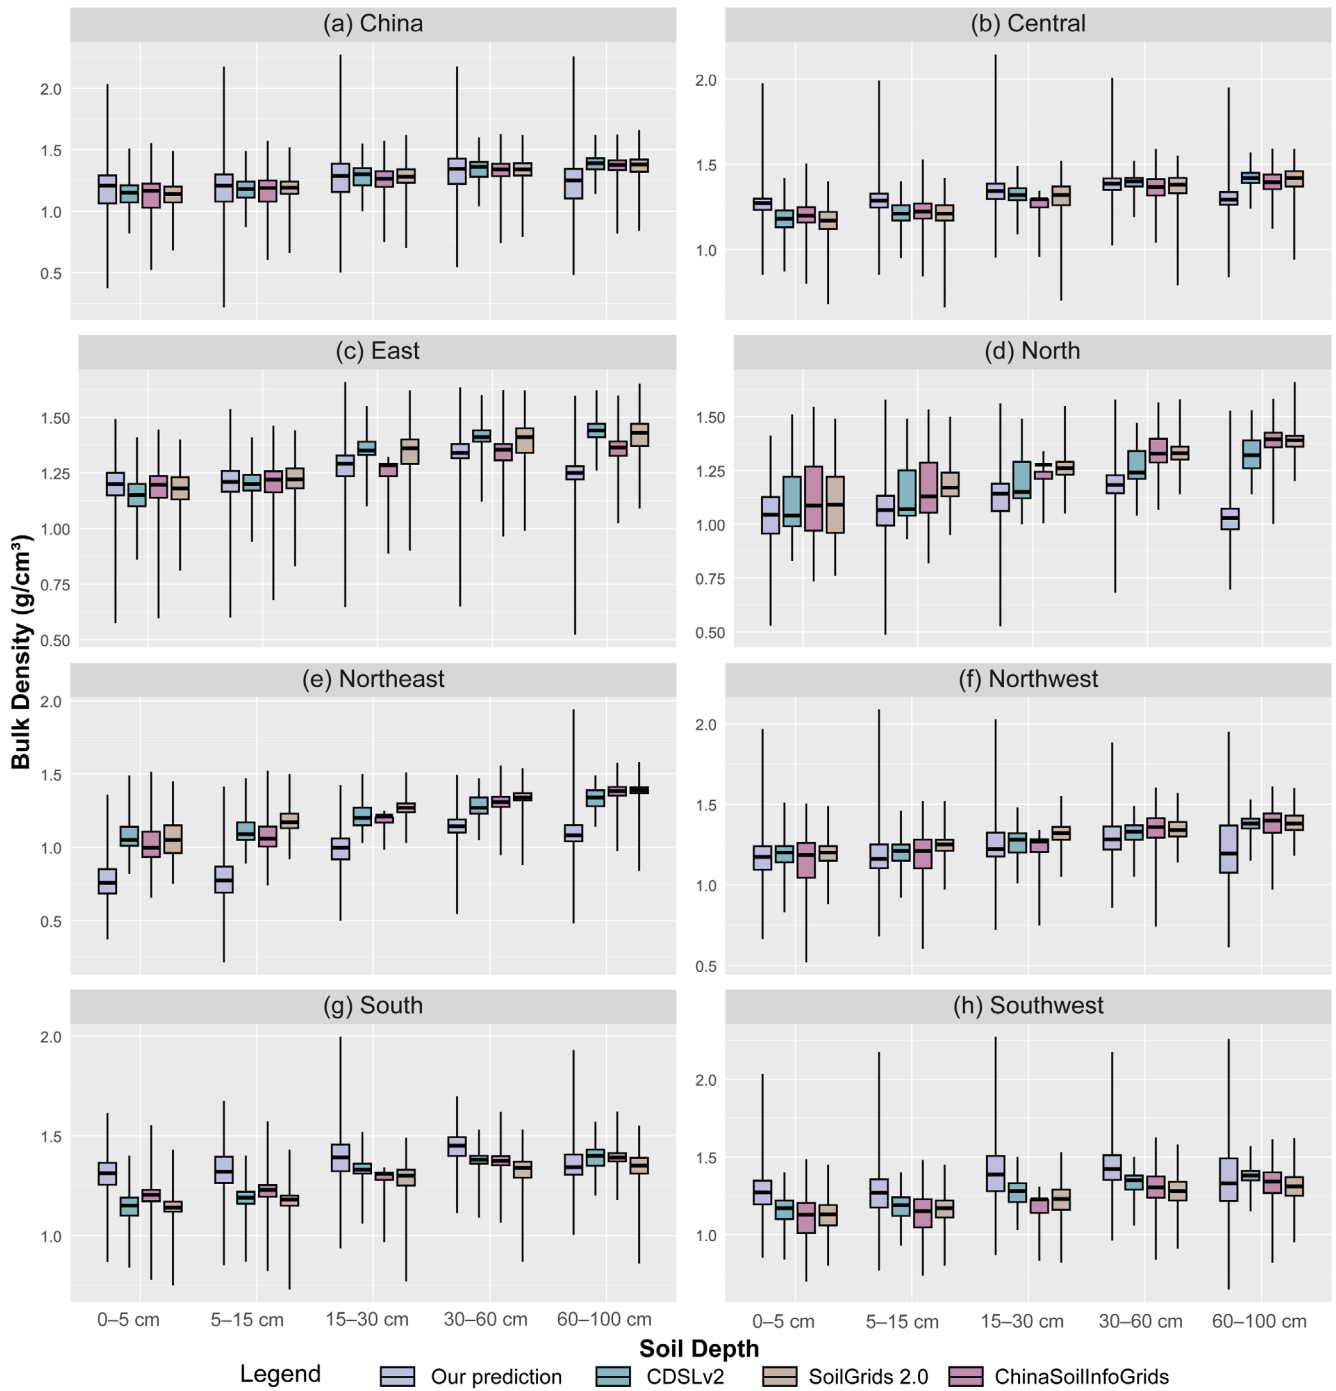

35

**Figure S5. Statistical distribution of soil bulk density (BD) across five depths in (a) China and seven geographical regions: (b) Central, (c) East, (d) North, (e) Northeast, (f) Northwest, (g) South, (h) Southwest.**

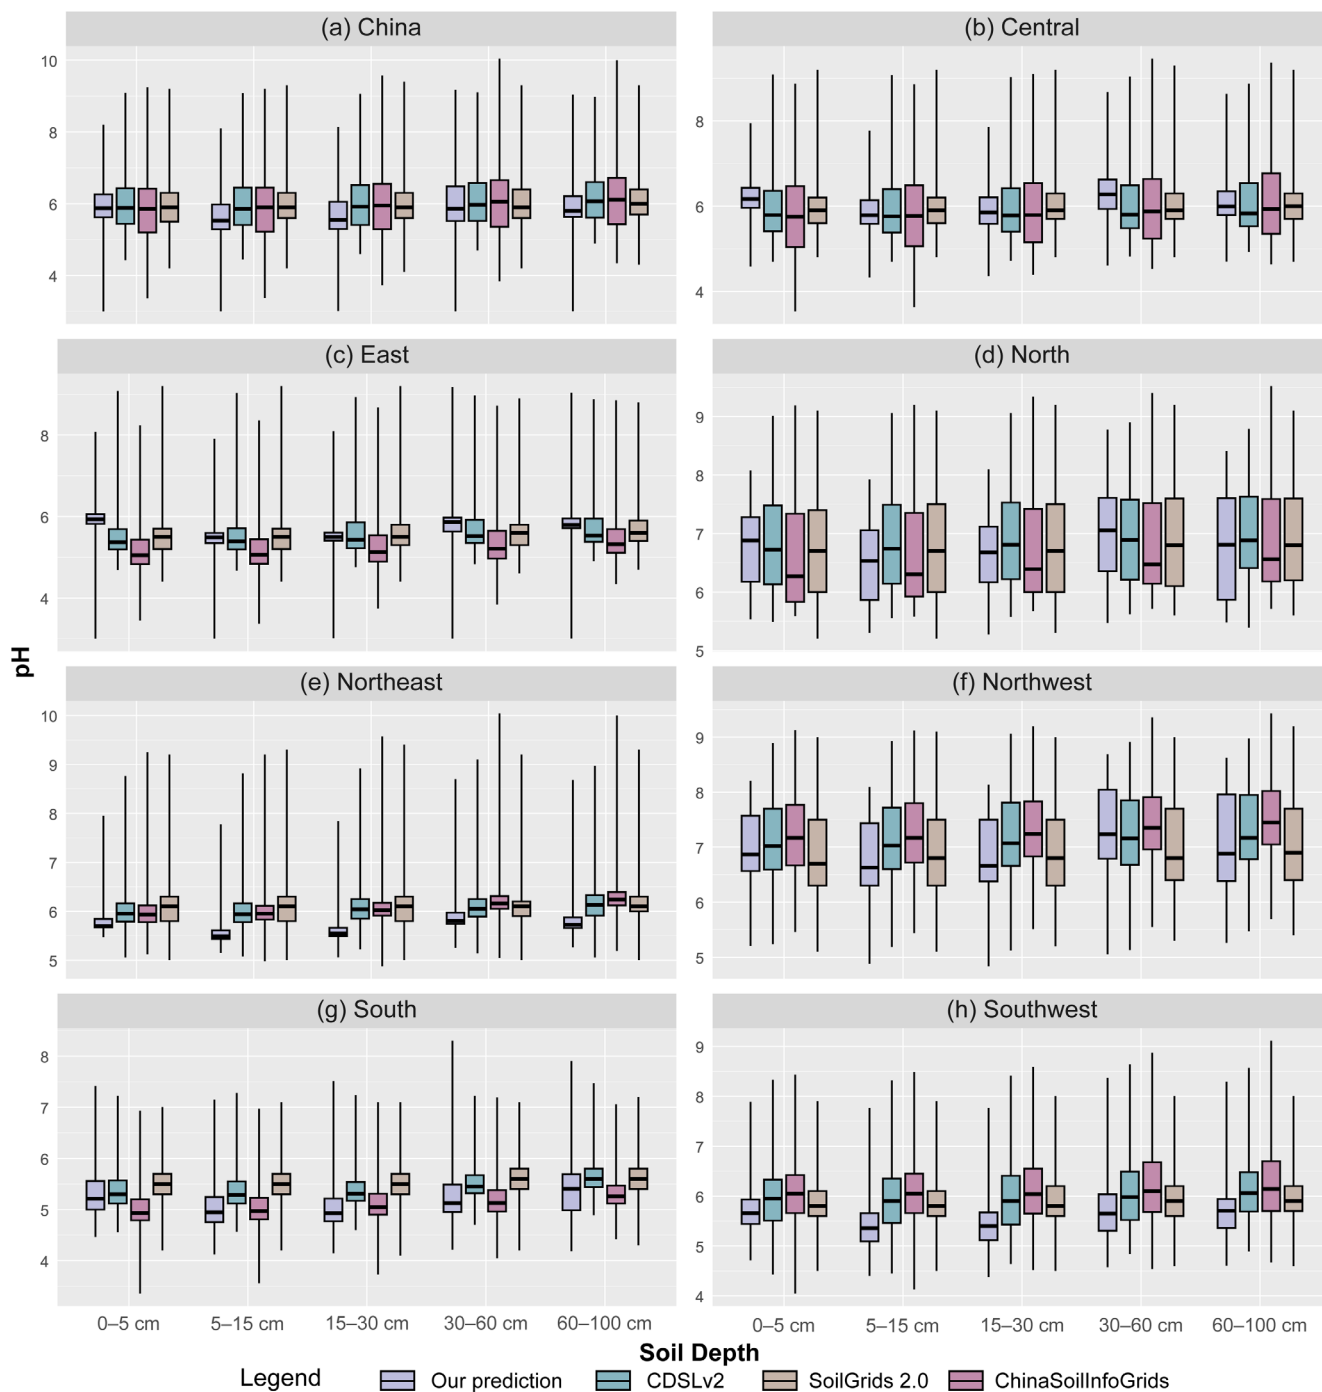

40 **Figure S6. Statistical distribution of soil pH across five depths in (a) China and seven geographical regions: (b) Central, (c) East, (d) North, (e) Northeast, (f) Northwest, (g) South, (h) Southwest.**

## S2 Supplementary Tables

**Table S1 Reference and comparison datasets for environmental covariates.**

| Name                                               | Abbreviation | Scale/resolution | Category <sup>a)</sup> | Type <sup>b)</sup> | Source                |
|----------------------------------------------------|--------------|------------------|------------------------|--------------------|-----------------------|
| Digital Elevation Model                            | Elevation    | 30 m             | t                      | Q                  | (Peng et al., 2024)   |
| Slope                                              | Slope        | 30 m             | t                      | Q                  | -                     |
| Aspect                                             | Aspect       | 30 m             | t                      | Q                  | -                     |
| Plan curvature                                     | PlanCur      | 30 m             | t                      | Q                  | -                     |
| Profile curvature                                  | ProCur       | 30 m             | t                      | Q                  | -                     |
| topographic wetness index                          | TWI          | 30 m             | t                      | Q                  | -                     |
| Soil Surface Roughness                             | SSR          | 30 m             | t                      | Q                  | -                     |
| Elevation Relief Ratio                             | ERR          | 30 m             | t                      | Q                  | -                     |
| Local Position Index                               | LPI          | 30 m             | t                      | Q                  | -                     |
| Geomorphological Types Map                         | Geomor       | 1:2.5 M          | t                      | C                  | RESDC <sup>c)</sup>   |
| Soil type                                          | Soil         | 1:1 M            | s                      | C                  | RESDC                 |
| Clay                                               | Clay         | 1:1 M            | s                      | Q                  | RESDC                 |
| Silt                                               | Silt         | 1:1 M            | s                      | Q                  | RESDC                 |
| Sand                                               | Sand         | 1:1 M            | s                      | Q                  | RESDC                 |
| Additive Log-Ratio of Sand to Clay                 | ALR1         | 1:1 M            | s                      | Q                  | -                     |
| Additive Log-Ratio of Silt to Clay                 | ALR2         | 1:1 M            | s                      | Q                  | -                     |
| Mean Annual Soil Moisture Content Index            | SMCI_A       | 1 km             | s                      | Q                  | (Yao et al., 2021)    |
| Growing Season Soil Moisture Content Index         | SMCI_GS      | 1 km             | s                      | Q                  | (Yao et al., 2021)    |
| Parent Material                                    | PM           | 10 m             | p                      | Q                  | COAH <sup>d)</sup>    |
| Clay Mineral Ratio                                 | CMR          | 10 m             | p                      | Q                  | COAH                  |
| Geological map                                     | Geol         | 1:2.5 M          | p                      | C                  | (Pang et al., 2017)   |
| Depth to Bedrock                                   | DTB          | 100 m            | p                      | Q                  | (Yan et al., 2020)    |
| Forest type                                        | FT           | 1:2.5 M          | o                      | C                  | NESSDC <sup>e)</sup>  |
| Mean Annual Normalized Difference Vegetation Index | NDVI_A       | 250 m            | o                      | Q                  | MOD13Q1 <sup>f)</sup> |

|                                                        |          |       |   |   |                           |
|--------------------------------------------------------|----------|-------|---|---|---------------------------|
| Growing Season Normalized Difference Vegetation Index  | NDVI_GS  | 250 m | o | Q | MOD13Q1                   |
| Monthly Maximum Normalized Difference Vegetation Index | NDVI_MAX | 250 m | o | Q | MOD13Q1                   |
| Mean Annual Leaf Area Index                            | LAI_A    | 500 m | o | Q | MOD15A2H <sup>g)</sup>    |
| Growing Season Leaf Area Index                         | LAI_GS   | 500 m | o | Q | MOD15A2H                  |
| Net Primary Productivity                               | NPP      | 500 m | o | Q | MODIS17A3 <sup>h)</sup>   |
| Mean Annual Temperature                                | TEM_A    | 1 km  | c | Q | (Peng et al., 2019)       |
| Mean Growing Season Temperature                        | TEM_GS   | 1 km  | c | Q | (Peng et al., 2019)       |
| Monthly Maximum Temperature                            | TEM_MAX  | 1 km  | c | Q | (Peng et al., 2019)       |
| Monthly Minimum Temperature                            | TEM_MIN  | 1 km  | c | Q | (Peng et al., 2019)       |
| Mean Annual Precipitation                              | PRE_A    | 1 km  | c | Q | (Peng et al., 2019)       |
| Growing Season Precipitation                           | PRE_GS   | 1 km  | c | Q | (Peng et al., 2019)       |
| Mean Annual Evapotranspiration                         | PET_A    | 1 km  | c | Q | (Ding and Peng, 2021)     |
| Growing Season Evapotranspiration                      | PET_GS   | 1 km  | c | Q | (Ding and Peng, 2021)     |
| Mean Annual Solar Radiation                            | SR_A     | 5 km  | c | Q | (Abatzoglou et al., 2018) |
| Growing Season Solar Radiation                         | SR_GS    | 5 km  | c | Q | (Abatzoglou et al., 2018) |
| Mean Annual Normalized Difference Water Index          | NDWI_A   | 250 m | c | Q | MOD09A1 <sup>i)</sup>     |
| Growing Season Normalized Difference Water Index       | NDWI_GS  | 250 m | c | Q | MOD09A1                   |

Note: a) t: topography; p: parent material; o: organisms; s: soil; c: climate. b) Q: quantitative; C: categorical. c) RESDC (Resources and  
45 Environmental Sciences, <http://www.resdc.cn>). d) COAH (Copernicus Open Access Hub, <https://scihub.copernicus.eu>). e) NESSDC (National Earth System Science Data Center, <http://www.geodata.cn>). f) MOD13Q1 (<https://ladsweb.modaps.eosdis.nasa.gov/missions-and-measurements/products/MOD13Q1>). g) MOD15A2H (<https://www.earthdata.nasa.gov/data/catalog/lpcloud-mod15a2h-061>). h) MODIS17A3 (<https://www.earthdata.nasa.gov/data/catalog/lpcloud-mod17a3hgf-061>). i) MOD09A1 (<https://ladsweb.modaps.eosdis.nasa.gov/missions-and-measurements/products/MOD09A1>).

55 **Table S2. Source information for internal forest soil survey campaigns used in this study.**

| Survey / project name                                     | Year      | Geographic coverage         | Number of profiles |
|-----------------------------------------------------------|-----------|-----------------------------|--------------------|
| Typical Forest Soil Survey Project                        | 2018–2020 | Nationwide                  | 1198               |
| Henan Forest Soil Survey Project                          | 2018-2020 | Henan Province              | 800                |
| Survey of Understory Vegetation and Soil in Tibet         | 2022      | Tibet                       | 19                 |
| Southwest China Transect and Forest Vegetation Survey     | 2019      | Southwest China             | 36                 |
| Shennongjia Forest Soil Type Survey Project               | 2022      | Shennongjia                 | 68                 |
| Hubei Carbon Sink Survey Project                          | 2019      | Hubei Province              | 121                |
| Economic Forest Survey in the Three Gorges Reservoir Area | 2021      | Three Gorges Reservoir Area | 430                |
| Masson Pine Plantation Survey                             | 2018      | Nationwide                  | 147                |
| Chongqing Carbon Sink Monitoring Project                  | 2022      | Chongqing                   | 534                |
| This study                                                | 2023      | Nationwide                  | 1003               |

**Table S3. Number of sampling plots for bulk density (BD) (g/cm<sup>3</sup>) and pH in surface soil (0–5 cm) across different soil types in the training and independent validation datasets.**

| Soil Type                     | BD              |                 | pH  |     | Soil Type               | BD  |     | pH  |     |
|-------------------------------|-----------------|-----------------|-----|-----|-------------------------|-----|-----|-----|-----|
|                               | T <sup>a)</sup> | V <sup>b)</sup> | T   | V   |                         | T   | V   | T   | V   |
| Brown coniferous forest soils | 18              | 4               | 20  | 13  | Fluvo-aquic soils       | 144 | 61  | 39  | 31  |
| Torrid red soils              | 3               | 1               | 2   | 2   | Bog soils               | 14  | 6   | 19  | 15  |
| Cinnamon soils                | 317             | 79              | 134 | 90  | Peaty bog soils         | 1   | 1   | 2   | 1   |
| Gray-cinnamon soils           | 301             | 70              | 165 | 105 | Meadow solonchaks       | 3   | 1   | 2   | 2   |
| Black soils                   | 5               | 1               | 2   | 2   | Coastal solonchaks      | 4   | 1   | 2   | 2   |
| Gray-forest soils             | 2               | 0               | 2   | 2   | Paddy soils             | 143 | 58  | 121 | 91  |
| Chernozems                    | 6               | 1               | 4   | 3   | Irrigated warped soils  | 3   | 1   | 2   | 2   |
| Castanozems                   | 30              | 7               | 18  | 12  | Irrigated desert soils  | 3   | 1   | 2   | 2   |
| Castano-cinnamon soils        | 4               | 1               | 7   | 5   | Felty soils             | 20  | 9   | 57  | 45  |
| Dark loessial soils           | 18              | 4               | 10  | 7   | Dark felty soils        | 84  | 35  | 107 | 81  |
| Sierozems                     | 7               | 2               | 5   | 3   | Cold calcic soils       | 3   | 1   | 39  | 30  |
| Yellow soils                  | 113             | 27              | 80  | 51  | Cold brown calcic soils | 1   | 1   | 56  | 42  |
| Neo-alluvial soils            | 51              | 13              | 13  | 8   | Frigid frozen soils     | 4   | 1   | 3   | 2   |
| Aeolian soils                 | 62              | 14              | 10  | 7   | Latosols                | 21  | 9   | 12  | 9   |
| Limestone soils               | 138             | 34              | 92  | 61  | Latosolic red soils     | 105 | 45  | 63  | 50  |
| Volcanic soils                | 4               | 1               | 3   | 2   | Red soils               | 282 | 115 | 211 | 159 |
| Purplish soils                | 126             | 31              | 121 | 80  | Yellow soils            | 223 | 96  | 264 | 208 |
| Lithosols                     | 22              | 5               | 4   | 2   | Yellow-brown soils      | 330 | 135 | 181 | 137 |
| Skeletal soils                | 139             | 35              | 55  | 37  | Yellow-cinnamon soils   | 118 | 50  | 20  | 15  |
| Meadow soils                  | 41              | 10              | 42  | 27  | Brown soils             | 224 | 92  | 145 | 109 |
| Sajiang black soils           | 6               | 2               | 2   | 1   | Dark-brown soils        | 87  | 37  | 90  | 71  |
| Mountain meadow soils         | 13              | 3               | 4   | 2   | Bleached baijiang soils | 6   | 2   | 5   | 4   |
| Meadow soils                  | 2               | 1               | 4   | 2   |                         |     |     |     |     |

60 Note: a) T: Training datasets. b) V: Validation datasets.

**Table S4. Number of sampling plots for bulk density (BD) and pH in surface soil (0–5 cm) across different geomorphological types in the training and independent validation datasets.**

| Geomor Types            | BD              |                 | pH   |     | Geomor Types       | BD  |    | pH  |     |
|-------------------------|-----------------|-----------------|------|-----|--------------------|-----|----|-----|-----|
|                         | T <sup>a)</sup> | V <sup>b)</sup> | T    | V   |                    | T   | V  | T   | V   |
| Mountain                | 2897            | 636             | 2589 | 688 | Platform           | 78  | 48 | 64  | 39  |
| Loess ridge-hill        | 44              | 10              | 42   | 12  | Plain              | 251 | 97 | 332 | 129 |
| Loess terrace-tableland | 11              | 2               | 5    | 1   | Alluvial fan plain | 141 | 87 | 6   | 4   |
| Loess tableland         | 34              | 8               | 28   | 7   | Low floodplain     | 5   | 2  | 6   | 2   |
| Gully erosion landform  | 3               | 1               | 3    | 1   |                    |     |    |     |     |

Note: a) T: Training datasets. b) V: Validation datasets.

65 **Table S5. Number of sampling plots for bulk density (BD) and pH in surface soil (0–5 cm) across different forest types in the training and independent validation datasets.**

| Forest Type                       | BD              |                 | pH   |     |
|-----------------------------------|-----------------|-----------------|------|-----|
|                                   | T <sup>a)</sup> | V <sup>b)</sup> | T    | V   |
| Coniferous forest                 | 1837            | 459             | 1868 | 467 |
| Broad-leaved forest               | 1390            | 595             | 1085 | 465 |
| Mixed coniferous-broadleaf forest | 56              | 18              | 55   | 18  |

Note: a) T: Training datasets. b) V: Validation datasets.

**Table S6. Statistical summary of soil bulk density (BD) (g/cm<sup>3</sup>) and pH across five depth intervals.**

| Property | Depth (cm) | N    | Mean  | SD    | Min   | Max   | Skewness |
|----------|------------|------|-------|-------|-------|-------|----------|
| BD       | 0–5        | 4356 | 1.206 | 0.261 | 0.152 | 2.057 | 0.162    |
|          | 5–15       | 3522 | 1.209 | 0.288 | 0.184 | 2.291 | 0.317    |
|          | 15–30      | 3488 | 1.287 | 0.269 | 0.201 | 2.271 | 0.422    |
|          | 30–60      | 2973 | 1.340 | 0.269 | 0.207 | 2.215 | 0.393    |
|          | 60–100     | 1506 | 1.242 | 0.308 | 0.257 | 2.291 | 0.367    |
| pH       | 0–5        | 3963 | 6.066 | 0.909 | 4.000 | 8.440 | 0.045    |
|          | 5–15       | 3962 | 6.131 | 0.991 | 4.000 | 8.515 | 0.111    |
|          | 15–30      | 3816 | 6.172 | 1.005 | 4.030 | 8.420 | 0.087    |
|          | 30–60      | 2783 | 6.458 | 1.198 | 4.040 | 8.640 | 0.194    |
|          | 60–100     | 1454 | 6.466 | 1.327 | 4.040 | 8.704 | 0.119    |

70

**Table S7 Tuned model parameters for soil bulk density (BD) and pH considered at five depth intervals.**

| Property | Depth (cm) | mtry | node.size | num.trees |
|----------|------------|------|-----------|-----------|
| BD       | 0–5        | 4    | 9         | 1163      |
|          | 5–15       | 3    | 4         | 1421      |
|          | 15–30      | 2    | 4         | 788       |
|          | 30–60      | 2    | 4         | 1179      |
|          | 60–100     | 9    | 3         | 947       |
| pH       | 0–5        | 7    | 9         | 941       |
|          | 5–15       | 5    | 11        | 607       |
|          | 15–30      | 13   | 6         | 828       |
|          | 30–60      | 9    | 9         | 252       |
|          | 60–100     | 3    | 5         | 509       |

**Table S8 Summary statistics of the soil bulk density (BD) (g/cm<sup>3</sup>) and pH.**

| Property | Depth (cm) | Minimum | 25%   | Mean  | Median | 75%   | Maximum | STD   |
|----------|------------|---------|-------|-------|--------|-------|---------|-------|
| BD       | 0–5        | 0.372   | 1.062 | 1.157 | 1.208  | 1.291 | 2.034   | 0.213 |
|          | 5–15       | 0.217   | 1.078 | 1.165 | 1.208  | 1.299 | 2.175   | 0.218 |
|          | 15–30      | 0.499   | 1.155 | 1.267 | 1.288  | 1.386 | 2.272   | 0.189 |
|          | 30–60      | 0.545   | 1.221 | 1.336 | 1.344  | 1.427 | 2.176   | 0.152 |
|          | 60–100     | 0.479   | 1.104 | 1.251 | 1.250  | 1.343 | 2.258   | 0.199 |
| pH       | 0–5        | 3.000   | 5.618 | 5.997 | 5.874  | 6.260 | 8.204   | 0.654 |
|          | 5–15       | 3.002   | 5.285 | 5.697 | 5.528  | 5.981 | 8.097   | 0.685 |
|          | 15–30      | 3.012   | 5.297 | 5.731 | 5.545  | 6.055 | 8.136   | 0.710 |
|          | 30–60      | 3.000   | 5.518 | 6.056 | 5.862  | 6.482 | 9.179   | 0.814 |
|          | 60–100     | 3.004   | 5.634 | 6.013 | 5.800  | 6.210 | 9.036   | 0.755 |

**Table S9 FRFS–Selected environmental covariates for soil bulk density (BD) at five depth intervals.**

| Depth (cm) | Abbreviation | VIF   | N  | Depth (cm) | Abbreviation | VIF   | N |
|------------|--------------|-------|----|------------|--------------|-------|---|
| 0–5        | ALR2         | 1.551 | 13 | 15–30      | Elevation    | 2.516 | 7 |
|            | DTB          | 1.765 |    |            | PRE_A        | 2.520 |   |
|            | SR_GS        | 1.795 |    |            | PET_A        | 2.805 |   |
|            | Geomor       | 1.825 |    | Soil       | 2.644        |       |   |
|            | NDVI_GS      | 2.092 |    | 30–60      | DTB          | 1.173 | 9 |
|            | NDVI_MAX     | 2.266 |    |            | LAI_GS       | 1.190 |   |
|            | NPP          | 2.714 |    |            | SR_GS        | 1.335 |   |
|            | NDWI_A       | 3.795 |    |            | NPP          | 2.284 |   |
|            | Elevation    | 4.798 |    |            | Elevation    | 2.601 |   |
|            | PRE_A        | 5.116 |    |            | NDWI_A       | 3.262 |   |
|            | PET_GS       | 9.296 |    |            | PET_A        | 3.355 |   |
|            | PET_A        | 9.741 |    |            | PRE_A        | 3.620 |   |
|            | Soil         | 3.335 |    |            | Soil         | 2.604 |   |
| 5–15       | DTB          | 1.192 | 7  | 60–100     | DTB          | 1.161 | 9 |
|            | SR_GS        | 1.431 |    |            | SR_GS        | 1.212 |   |
|            | NDWI_GS      | 1.444 |    |            | LAI_GS       | 1.265 |   |
|            | PRE_A        | 2.357 |    |            | NPP          | 2.708 |   |
|            | Elevation    | 2.550 |    |            | Elevation    | 2.935 |   |
|            | PET_A        | 2.851 |    |            | PET_A        | 4.299 |   |
| 15–30      | Soil         | 2.664 | 7  | NDWI_A     | 4.466        |       |   |
|            | LAI_A        | 1.217 |    | PRE_A      | 4.773        |       |   |
|            | SR_GS        | 1.432 |    | Soil       | 2.447        |       |   |
|            | NPP          | 1.801 |    |            |              |       |   |

85 Table S10 FRFS–Selected environmental covariates for soil pH at five depth intervals.

| Depth (cm) | Abbreviation | VIF     | N     | Depth (cm) | Abbreviation | VIF   | N  |
|------------|--------------|---------|-------|------------|--------------|-------|----|
| 0–5        | FT           | 1.117   | 13    | 15–30      | PRE_A        | 4.009 | 12 |
|            | LAI_A        | 1.228   |       |            | NDWI_A       | 5.454 |    |
|            | DTB          | 1.246   |       |            | Soil         | 2.678 |    |
|            | SR_GS        | 1.479   |       | 30–60      | FT           | 1.182 | 16 |
|            | NDVI_MAX     | 2.748   |       |            | LAI_A        | 1.300 |    |
|            | NPP          | 2.801   |       |            | Silt         | 1.333 |    |
|            | CMR          | 2.856   |       |            | DTB          | 1.388 |    |
|            | PET_A        | 3.033   |       |            | Geomor       | 1.433 |    |
|            | PM           | 3.045   |       |            | SR_GS        | 1.488 |    |
|            | Elevation    | 3.291   |       |            | NDVI_MAX     | 2.101 |    |
|            | PRE_A        | 3.995   |       |            | PM           | 2.129 |    |
|            | NDWI_A       | 6.519   |       |            | ALR2         | 2.203 |    |
|            | Soil         | 2.115   |       |            | NPP          | 2.552 |    |
| 5–15       | Silt         | 1.102   | 12    | NDVI_A     | 2.593        |       |    |
|            | LAI_A        | 1.231   |       | Elevation  | 2.672        |       |    |
|            | DTB          | 1.238   |       | PRE_A      | 3.928        |       |    |
|            | SR_GS        | 1.405   |       | PET_A      | 4.112        |       |    |
|            | PM           | 2.514   |       | NDWI_A     | 4.729        |       |    |
|            | NDVI_MAX     | 2.700   |       | Soil       | 2.547        |       |    |
|            | NPP          | 2.785   |       | 60–100     | SR_GS        | 1.471 | 15 |
|            | PET_A        | 3.012   |       |            | LAI_A        | 1.558 |    |
|            | Elevation    | 3.144   |       |            | DTB          | 1.566 |    |
|            | PRE_A        | 3.976   |       |            | Geomor       | 1.769 |    |
|            | NDWI_A       | 5.610   |       |            | ALR2         | 2.037 |    |
| Soil       | 2.548        | NDVI_GS | 2.162 |            |              |       |    |
| 15–30      | Silt         | 1.102   | 12    | PM         | 2.451        |       |    |
|            | DTB          | 1.390   |       | NPP        | 3.022        |       |    |
|            | SR_GS        | 1.394   |       | Elevation  | 3.184        |       |    |
|            | Geomor       | 1.413   |       | NDVI_MAX   | 3.450        |       |    |
|            | PM           | 2.497   |       | PET_A      | 4.850        |       |    |
|            | NDVI_MAX     | 2.671   |       | PRE_A      | 5.497        |       |    |
|            | NPP          | 2.886   |       | NDWI_GS    | 6.082        |       |    |
|            | PET_A        | 3.053   |       | NDWI_A     | 7.105        |       |    |
|            | Elevation    | 3.111   |       | Soil       | 2.024        |       |    |

## Reference

- Abatzoglou, J. T., Dobrowski, S. Z., Parks, S. A., and Hegewisch, K. C.: TerraClimate, a high-resolution global dataset of monthly climate and climatic water balance from 1958–2015, *Sci Data*, 5, 170191, <https://doi.org/10.1038/sdata.2017.191>, 2018.
- Ding, Y. and Peng, S.: Spatiotemporal change and attribution of potential evapotranspiration over china from 1901 to 2100, *Theor. Appl. Climatol.*, 145, 79–94, <https://doi.org/10.1007/s00704-021-03625-w>, 2021.
- Pang, J. F., Ding, X. Z., Han, K. Y., Zeng, Y., Chen, A. S., Zhang, Y. L., Zhang, Q. H., and Yao, D. S.: The national 1: 1000000 geological map spatial database, *Geol. China*, 44, 8–18, 2017.
- Peng, S., Ding, Y., Liu, W., and Li, Z.: 1 km monthly temperature and precipitation dataset for China from 1901 to 2017, *Earth Syst. Sci. Data*, 11, 1931–1946, <https://doi.org/10.5194/essd-11-1931-2019>, 2019.
- Peng, X., He, G., Wang, G., Yin, R., Yang, R., Peng, Y., Long, T., Zhang, Z., Chen, Y., and Wang, J.: GF-1 WFV satellite images based forest cover mapping in China supported by open land use/cover datasets, *Sci Data*, 11, 1355, <https://doi.org/10.1038/s41597-024-04202-2>, 2024.
- Yan, F., Shangguan, W., Zhang, J., and Hu, B.: Depth-to-bedrock map of China at a spatial resolution of 100 meters, *Sci Data*, 7, 2, <https://doi.org/10.1038/s41597-019-0345-6>, 2020.
- Yao, P., Lu, H., Shi, J., Zhao, T., Yang, K., Cosh, M. H., Gianotti, D. J. S., and Entekhabi, D.: A long term global daily soil moisture dataset derived from AMSR-E and AMSR2 (2002–2019), *Sci Data*, 8, 143, <https://doi.org/10.1038/s41597-021-00925-8>, 2021.
